# Supplementary material for: Contamination and Risk Assessment of Potentially Toxic Elements in Coastal Sediments of the Area between Al-Jubail and Al-Khafji, Arabian Gulf, Saudi Arabia
Source: MDPI journal article supplement (doi:10.3390/w15030573), 2023-02-01
Supplement: s1 [file s1]

**Table S1.** The location (GPS) of the sampling sites and the PTE concentrations (mg/kg).

| S.N. | Lat.     | Long.    | As   | Cr   | Cu   | Ni   | Pb   | Zn   | Hg   |
|------|----------|----------|------|------|------|------|------|------|------|
| S1   | 27 00 84 | 49 40 00 | 2.00 | 8.00 | 3.00 | 13.0 | 4.00 | 14.0 | 1.00 |
| S2   | 27 01 41 | 49 38 32 | 2.00 | 8.00 | 4.00 | 15.0 | 4.00 | 10.0 | 1.00 |
| S3   | 27 03 03 | 49 37 47 | 3.00 | 7.00 | 3.00 | 5.00 | 3.00 | 9.00 | 0.50 |
| S4   | 27 04 55 | 49 35 28 | 2.00 | 9.00 | 3.00 | 12.0 | 1.50 | 6.00 | 0.50 |
| S5   | 27 05 18 | 49 35 08 | 4.00 | 7.00 | 3.00 | 13.0 | 2.00 | 8.00 | 0.50 |
| S6   | 27 06 37 | 49 34 32 | 3.00 | 7.00 | 2.00 | 10.0 | 5.00 | 6.00 | 0.50 |
| S7   | 27 09 09 | 49 34 07 | 2.00 | 5.00 | 2.00 | 2.00 | 2.00 | 4.00 | 0.50 |
| S8   | 27 09 43 | 49 33 16 | 2.00 | 8.00 | 2.00 | 6.00 | 2.00 | 4.00 | 1.00 |
| S9   | 27 11 04 | 49 31 16 | 4.00 | 8.00 | 2.00 | 9.00 | 2.00 | 7.00 | 1.00 |
| S10  | 27 07 56 | 49 30 28 | 2.00 | 6.00 | 2.00 | 3.00 | 1.50 | 4.00 | 1.00 |
| S11  | 27 09 18 | 49 23 26 | 2.00 | 11.0 | 3.00 | 12.0 | 2.00 | 6.00 | 0.50 |
| S12  | 27 19 01 | 49 18 44 | 3.00 | 11.0 | 3.00 | 13.0 | 1.50 | 7.00 | 0.50 |
| S13  | 27 29 52 | 49 16 17 | 1.50 | 3.00 | 1.00 | 10.0 | 2.00 | 2.00 | 1.00 |
| S14  | 27 36 12 | 48 55 34 | 2.00 | 7.00 | 1.00 | 8.00 | 3.00 | 3.00 | 0.50 |
| S15  | 27 36 08 | 48 55 23 | 2.00 | 6.00 | 1.00 | 6.00 | 3.00 | 3.00 | 0.50 |
| S16  | 27 35 44 | 48 55 03 | 1.50 | 4.00 | 1.00 | 5.00 | 2.00 | 2.00 | 1.00 |
| S17  | 27 34 43 | 48 55 35 | 4.00 | 15.0 | 4.00 | 25.0 | 4.00 | 10.0 | 1.00 |
| S18  | 27 34 01 | 48 53 42 | 2.00 | 8.00 | 2.00 | 6.00 | 3.00 | 4.00 | 0.50 |
| S19  | 27 37 40 | 48 50 52 | 3.00 | 14.0 | 4.00 | 15.0 | 3.00 | 9.00 | 0.50 |
| S20  | 27 39 00 | 48 51 14 | 3.00 | 18.0 | 5.00 | 26.0 | 4.00 | 13.0 | 1.00 |
| S21  | 27 39 32 | 48 50 46 | 1.50 | 7.00 | 2.00 | 4.00 | 2.00 | 3.00 | 1.00 |
| S22  | 27 43 11 | 48 47 18 | 1.50 | 6.00 | 2.00 | 3.00 | 1.50 | 3.00 | 1.00 |
| S23  | 27 44 30 | 48 47 54 | 1.50 | 8.00 | 2.00 | 4.00 | 2.00 | 4.00 | 0.50 |
| S24  | 27 46 03 | 48 48 21 | 1.50 | 9.00 | 2.00 | 7.00 | 2.00 | 4.00 | 0.50 |
| S25  | 27 47 09 | 48 48 28 | 3.00 | 11.0 | 3.00 | 15.0 | 2.00 | 7.00 | 0.50 |
| S26  | 27 57 34 | 48 44 39 | 2.00 | 4.0  | 1.00 | 9.00 | 1.50 | 4.00 | 1.00 |
| S27  | 28 00 55 | 48 41 41 | 2.00 | 3.00 | 1.00 | 10.0 | 1.50 | 3.00 | 0.50 |
| S28  | 28 01 31 | 48 41 07 | 1.50 | 3.00 | 1.00 | 11.0 | 2.00 | 2.00 | 1.00 |
| S29  | 28 06 27 | 48 37 03 | 2.00 | 7.00 | 2.00 | 11.0 | 2.00 | 4.00 | 1.00 |
| S30  | 28 10 14 | 48 36 43 | 3.00 | 20.0 | 4.00 | 31.0 | 4.00 | 12.0 | 1.00 |
| S31  | 28 11 41 | 48 37 25 | 3.00 | 20.0 | 5.00 | 32.0 | 4.00 | 14.0 | 1.00 |
| S32  | 28 18 26 | 48 31 37 | 3.00 | 4.00 | 1.00 | 15.0 | 2.00 | 3.00 | 1.00 |
